# Supplementary material for: Chemical exfoliation of graphitic carbon nitride for efficient heterogeneous photocatalysis
Source: Royal Society of Chemistry journal article supplement (doi:10.1039/c3ta13188b), 2013-01-01
Supplement: c3ta13188b.pdf [file c3ta13188b.pdf]

1  
2  
3  
4  
5  
6  
7  
8  
9  
10  
11  
12  
13  
14  
15  
16  
17  
18  
19  
20  
21  
22  
23  
24  
25  
26  
27  
28  
29  
30

*Supporting Information*

**Chemical exfoliation of graphitic carbon nitride for  
efficient heterogeneous photocatalysis**

Jing Xu, Liwu Zhang, Rui Shi, Yongfa Zhu

Department of Chemistry, Tsinghua University, Beijing, 100084, PR China

1  
2  
3

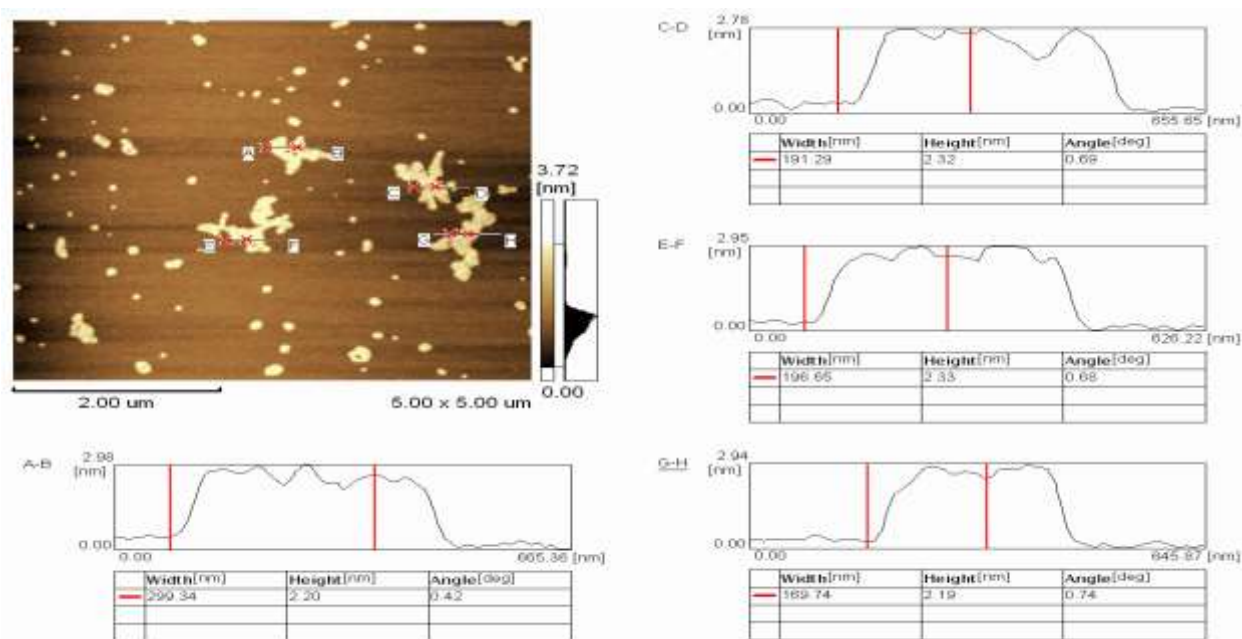

4  
5  
6  
7

**Figure S1.** AFM image and the thickness information of the g-C<sub>3</sub>N<sub>4</sub> using 75 wt% H<sub>2</sub>SO<sub>4</sub> for exfoliation.

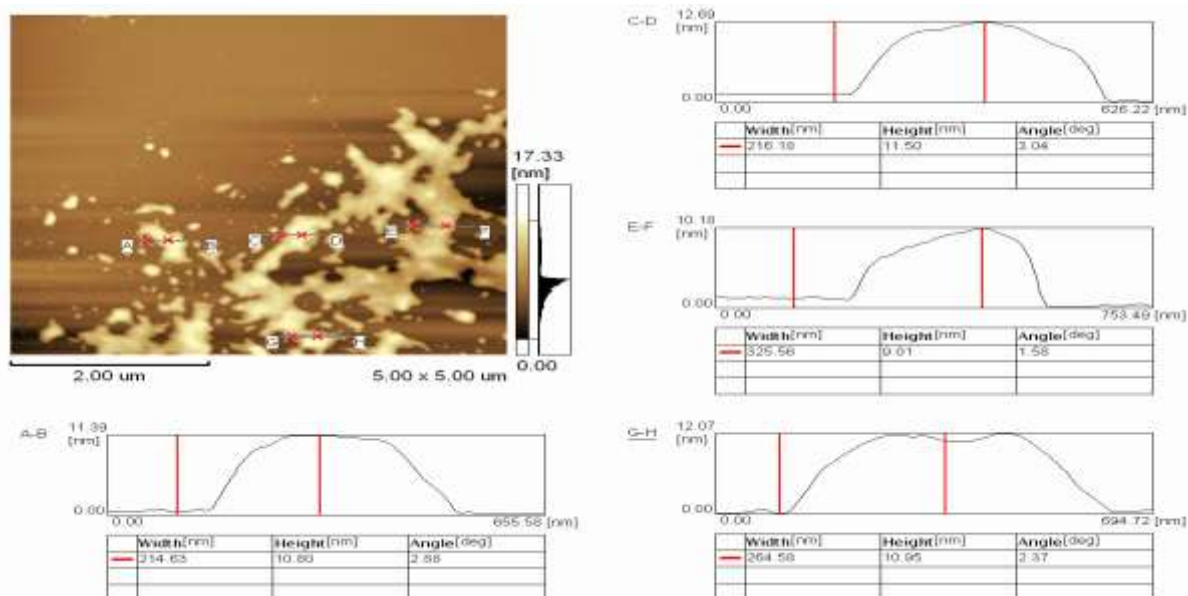

8  
9  
10  
11

**Figure S2.** AFM image and the thickness information of the g-C<sub>3</sub>N<sub>4</sub> using 50 wt% H<sub>2</sub>SO<sub>4</sub> for exfoliation.

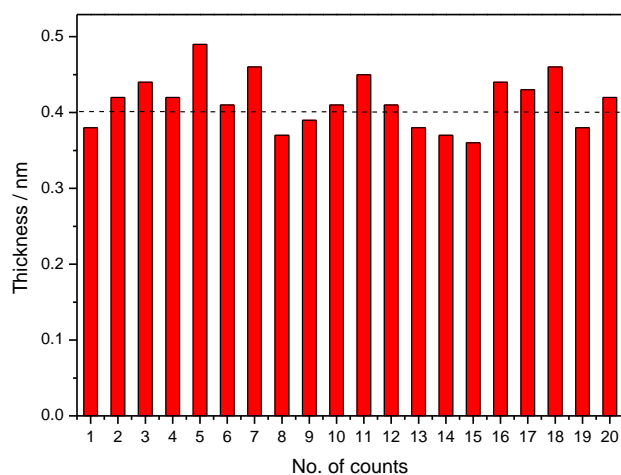

1

2 **Figure S3.** Statistical study of the thickness of the Monolayer-C<sub>3</sub>N<sub>4</sub> samples by AFM.

3

4

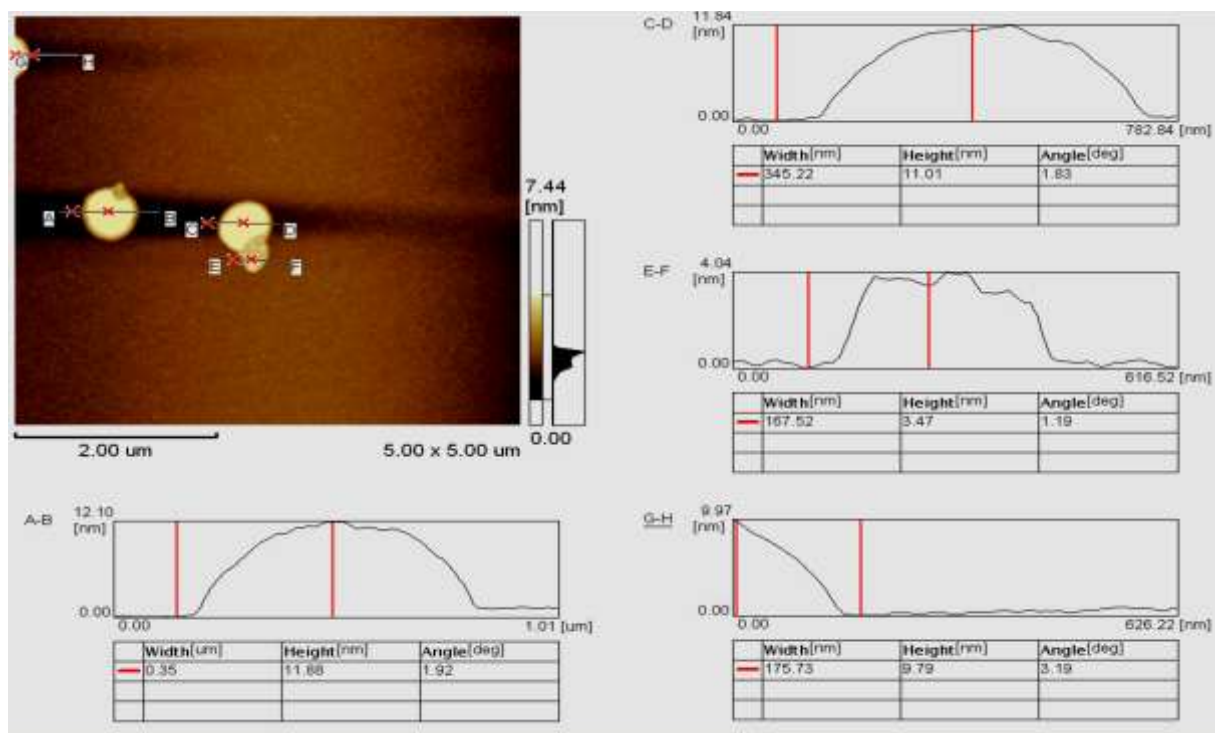

5

6 **Figure S4.** AFM image and the thickness information of the bulk g-C<sub>3</sub>N<sub>4</sub> before chemical  
7 exfoliation.

8

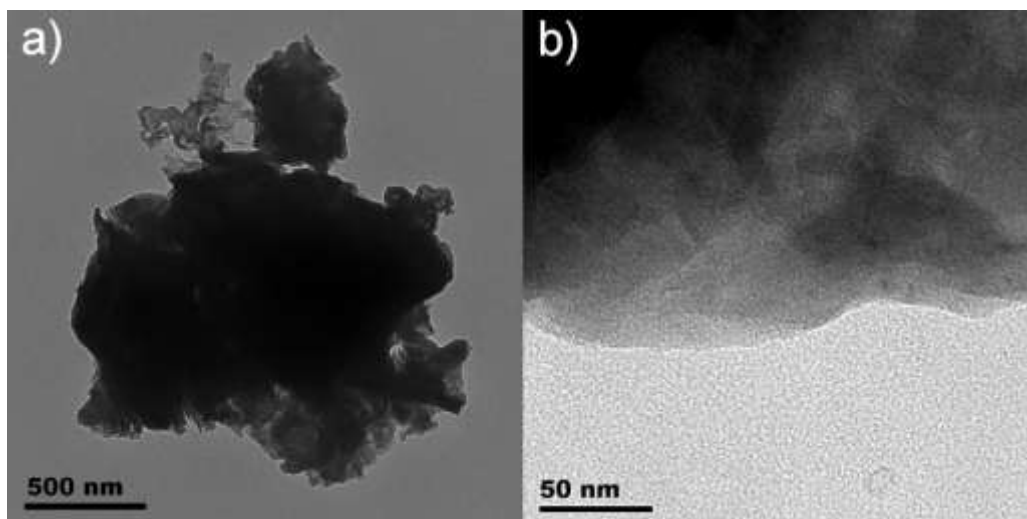

1

2

**Figure S5.** TEM images of the bulk  $g\text{-C}_3\text{N}_4$  before chemical exfoliation.

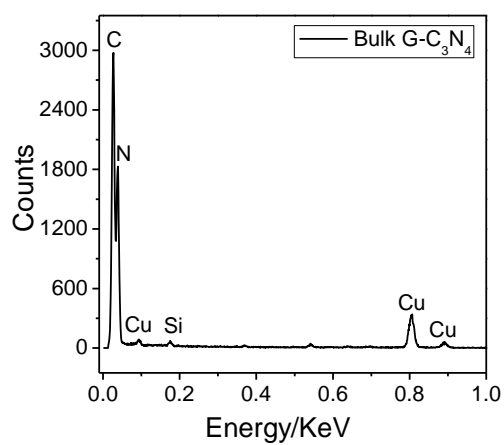

3

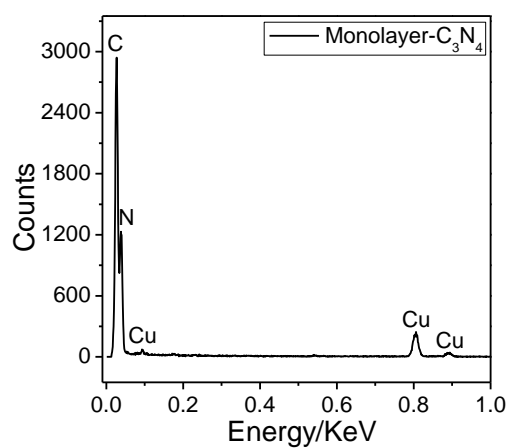

4

5

**Figure S6.** EDX elements analysis of the bulk  $g\text{-C}_3\text{N}_4$  and Monolayer- $\text{C}_3\text{N}_4$ .

6

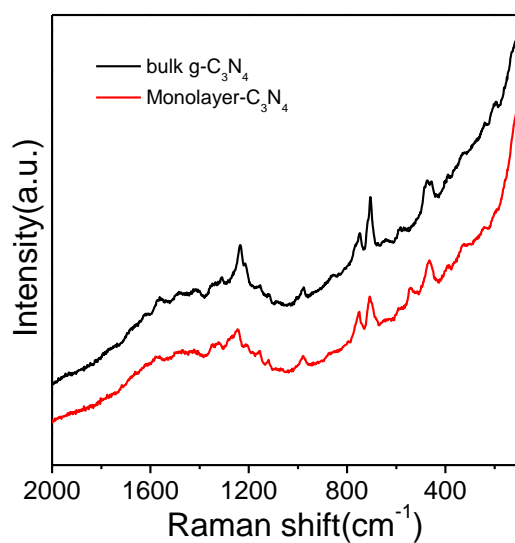

1

2

**Figure S7.** Raman spectra of the bulk  $g\text{-C}_3\text{N}_4$  and Monolayer- $\text{C}_3\text{N}_4$

3

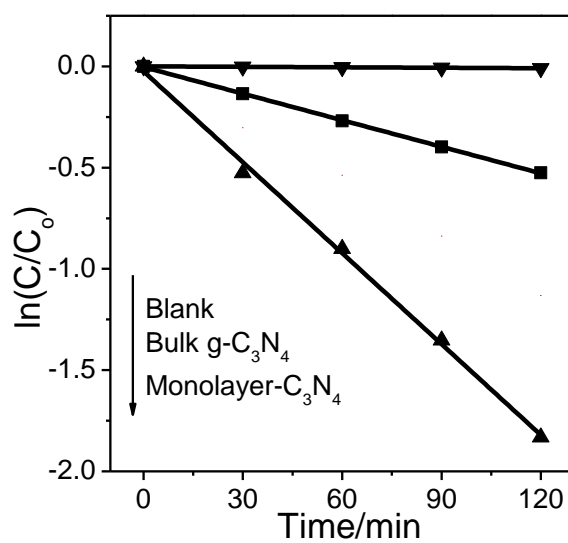

4

**Figure S8.** Photocatalytic degradation of MB under visible light irradiation with the presence of bulk  $g\text{-C}_3\text{N}_4$  and Monolayer- $\text{C}_3\text{N}_4$ .

7

8

9

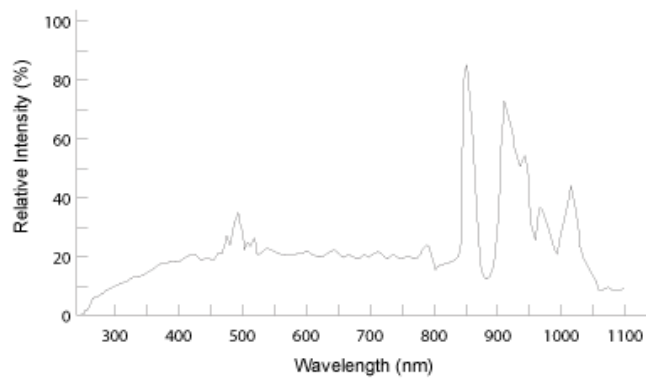

1

2

3

4

**Figure S9.** Light spectrum of Xenon lamp.
